# Supplementary material for: Integrative network-based analysis of mRNA and microRNA expression in 1,25-dihydroxyvitamin D3-treated cancer cells
Source: PubMed Central journal article supplement (PMC4537452; doi:10.1007/s12263-015-0484-0), 2015-08-15
Supplement: 12263_2015_484_MOESM1_ESM.pdf [file 12263_2015_484_MOESM1_ESM.pdf]

4. Carlberg, Carsten, and Sabine Seuter. "A genomic perspective on vitamin D signaling." *Anticancer research* 29.9 (2009): 3485-3493.
5. Carlberg, Carsten, Sabine Seuter, and Sami Heikkinen. "The first genome-wide view of vitamin D receptor locations and their mechanistic implications." *Anticancer research* 32.1 (2012): 271-282.
6. Carlberg, Carsten, et al. "Primary vitamin D target genes allow a categorization of possible benefits of vitamin D3 supplementation." *PLoS One* 8.7 (2013): e71042.
7. Chatterjee, Bandana, Ibtissam Echchgadda, and Chung Seog Song. "Vitamin D receptor regulation of the steroid/bile acid sulfotransferase SULT2A1." *Methods in enzymology* 400 (2005): 165-191.
8. Chen, Hankui, et al. "Vitamin D directly regulates Mdm2 gene expression in osteoblasts." *Biochemical and biophysical research communications* 430.1 (2013): 370-374.
9. Deeb, Kristin K., Donald L. Trump, and Candace S. Johnson. "Vitamin D signalling pathways in cancer: potential for anticancer therapeutics." *Nature Reviews Cancer* 7.9 (2007): 684-700.
10. Drissi, Hicham, et al. "1, 25-(OH) 2-vitamin D3 suppresses the bone-related Runx2/Cbfa1 gene promoter." *Experimental cell research* 274.2 (2002): 323-333.
11. Drocourt, Lionel, et al. "Expression of CYP3A4, CYP2B6, and CYP2C9 Is Regulated by the Vitamin D Receptor Pathway in Primary Human Hepatocytes." *Journal of Biological Chemistry* 277.28 (2002): 25125-25132.
12. Echchgadda, Ibtissam, et al. "Dehydroepiandrosterone sulfotransferase is a target for transcriptional induction by the vitamin D receptor." *Molecular pharmacology* 65.3 (2004): 720-729.
13. Feldman, D., J. W. Pike, and J. S. Adams. "Vitamin D. Vol 2." (2011).
14. Goeman, Frauke, et al. "VDR primary targets by genome-wide transcriptional profiling." *The Journal of steroid biochemistry and molecular biology* 143 (2014): 348-356.
15. Haussler, Mark R., et al. "Vitamin D receptor (VDR)-mediated actions of 1 $\alpha$ , 25 (OH) 2 vitamin D 3: genomic and non-genomic mechanisms." *Best Practice & Research Clinical Endocrinology & Metabolism* 25.4 (2011): 543-559.
16. Haussler, Mark R., et al. "Molecular mechanisms of vitamin D action." *Calcified tissue international* 92.2 (2013): 77-98.
17. Matilainen, Merja, et al. "Regulation of multiple insulin-like growth factor binding protein genes by 1 $\alpha$ , 25-dihydroxyvitamin D3." *Nucleic acids research* 33.17 (2005): 5521-5532.
18. Pike, J. Wesley, Mark B. Meyer, and Kathleen A. Bishop. "Regulation of target gene expression by the vitamin D receptor—an update on mechanisms." *Reviews in Endocrine and Metabolic Disorders* 13.1 (2012): 45-55.
19. Ramagopalan, Sreeram V., et al. "A ChIP-seq defined genome-wide map of vitamin D receptor binding: associations with disease and evolution." *Genome research* 20.10 (2010): 1352-1360.
20. Ryyänänen, Jussi, et al. "Changes in vitamin D target gene expression in adipose tissue monitor the vitamin D response of human individuals." *Molecular nutrition & food research* 58.10 (2014): 2036-2045.
21. Ryyänänen, Jussi, et al. "Gene regulatory scenarios of primary 1, 25-dihydroxyvitamin D3 target genes in a human myeloid leukemia cell line." *Cancers* 5.4 (2013): 1221-1241.
22. Seuter, Sabine, Jussi Ryyänänen, and Carsten Carlberg. "The ASAP2 gene is a primary target of 1, 25-dihydroxyvitamin D 3 in human monocytes and macrophages." *The Journal of steroid biochemistry and molecular biology* 144 (2014): 12-18.
23. Wang, Tian-Tian, et al. "Large-scale in silico and microarray-based identification of direct 1, 25-dihydroxyvitamin D3 target genes." *Molecular endocrinology* 19.11 (2005): 2685-2695.
24. Wilfinger, Julia, et al. "Primary vitamin D receptor target genes as biomarkers for the vitamin D 3 status in the hematopoietic system." *The Journal of nutritional biochemistry* 25.8 (2014): 875-884.
25. Yasunami, Yoko, et al. "C-jun N-terminal kinase modulates 1, 25-dihydroxyvitamin D3-induced cytochrome P450 3A4 gene expression." *Drug metabolism and disposition* 32.7 (2004): 685-688.

**Table S1:** 178 VDR target genes

| <b>Gene name</b> | <b>NCBI Gene ID</b> | <b>References (Pubmed ID)</b>                                              | <b>DE</b> |
|------------------|---------------------|----------------------------------------------------------------------------|-----------|
| <i>ABCA11</i>    | 79963               | 22782502, 21872797                                                         |           |
| <i>ABCB1</i>     | 5243                | 22782502, 21872797                                                         |           |
| <i>ABCD1</i>     | 215                 | 22782502, 21872797                                                         |           |
| <i>ADAMTS5</i>   | 11096               | 24247221                                                                   |           |
| <i>ADRA1B</i>    | 147                 | 22782502, 21872797                                                         |           |
| <i>ADRB2</i>     | 154                 | 22782502, 21872797                                                         |           |
| <i>ALOX5</i>     | 240                 | Feldman (2011), 19667142, 22213316, 20736230                               |           |
| <i>ALP1</i>      | 248                 | 22782502, 21872797                                                         |           |
| <i>ALPPL2</i>    | 251                 | 22782502, 21872797                                                         |           |
| <i>ASAP2</i>     | 8853                | 23999061                                                                   |           |
| <i>ATP2B1</i>    | 490                 | 21870057                                                                   | UP        |
| <i>ATP2C2</i>    | 9914                | 22782502, 21872797                                                         |           |
| <i>BDKRBI</i>    | 623                 | 24726990                                                                   |           |
| <i>BGLAP</i>     | 632                 | 17721433, 22782502, 21872797                                               |           |
| <i>BMP6</i>      | 654                 | 22782502, 21872797                                                         |           |
| <i>BTLA</i>      | 151888              | 22213316                                                                   |           |
| <i>CA9</i>       | 768                 | 22782502, 21872797                                                         |           |
| <i>CALB1</i>     | 12307               | 21870057                                                                   |           |
| <i>CAMP</i>      | 820                 | 16002434, 21872797, 22782502                                               |           |
| <i>CASP14</i>    | 23581               | 22782502, 16002434, 21872797                                               |           |
| <i>CASP5</i>     | 838                 | 16002434                                                                   |           |
| <i>CBS</i>       | 875                 | 21872797, 22782502                                                         |           |
| <i>CCNC</i>      | 892                 | Feldman (2011), 19667142, 22213316, 17721433, 20736230                     |           |
| <i>CCND1</i>     | 595                 | Feldman (2011)                                                             |           |
| <i>CCNE1</i>     | 898                 | Feldman (2011)                                                             |           |
| <i>CD14</i>      | 929                 | 24854954, 23923049                                                         | UP        |
| <i>CD200</i>     | 4345                | 22213316                                                                   |           |
| <i>CD40</i>      | 958                 | 20736230                                                                   |           |
| <i>CD9</i>       | 928                 | 24247221                                                                   |           |
| <i>CD97</i>      | 976                 | 24854954                                                                   |           |
| <i>CDC34</i>     | 997                 | 22782502, 21872797                                                         |           |
| <i>CDK2</i>      | 1017                | Feldman (2011)                                                             |           |
| <i>CDKAL1</i>    | 54901               | 20736230                                                                   |           |
| <i>CDKN1A</i>    | 1026                | Feldman (2011), 19667142, 22213316, 17721433, 21872797, 24202443, 22782502 |           |
| <i>CDKN1B</i>    | 1027                | Feldman (2011), 19667142                                                   |           |
| <i>CDKN2A</i>    | 1029                | Feldman (2011)                                                             |           |
| <i>CDKN2B</i>    | 1030                | Feldman (2011)                                                             | UP        |
| <i>CDKN2C</i>    | 1031                | Feldman (2011)                                                             | DOWN      |
| <i>CDKN2D</i>    | 1032                | Feldman (2011)                                                             | DOWN      |
| <i>CDX-2</i>     | 1045                | 22782502, 21872797                                                         |           |
| <i>CEACAM1</i>   | 634                 | 21872797                                                                   |           |
| <i>CEBPA</i>     | 1050                | 22782502, 21872797                                                         |           |
| <i>CLDN2</i>     | 9075                | 22782502, 21872797                                                         |           |
| <i>CLEC16A</i>   | 23274               | 20736230                                                                   |           |
| <i>CLMN</i>      | 79789               | 16002434                                                                   | UP        |
| <i>CLPTMIL</i>   | 81037               | 20736230                                                                   |           |
| <i>COL13A1</i>   | 1305                | 16002434                                                                   |           |
| <i>COLEC11</i>   | 78989               | 22782502, 21872797                                                         |           |

|                 |           |                                                                            |    |
|-----------------|-----------|----------------------------------------------------------------------------|----|
| <i>CREG2</i>    | 200407    | 22782502, 21872797                                                         |    |
| <i>CST1</i>     | 1469      | 22782502, 21872797                                                         |    |
| <i>CST6</i>     | 1474      | 16002434                                                                   |    |
| <i>CTLA4</i>    | 1493      | 20736230                                                                   |    |
| <i>CYP11A1</i>  | 1543      | 22782502, 21872797                                                         |    |
| <i>CYP24A1</i>  | 1591      | Feldman (2011), 19667142, 22213316, 17721433, 24726990, 21872797, 22782502 | UP |
| <i>CYP27B1</i>  | 1594      | Feldman (2011), 19667142, 22213316, 23923049, 17721433, 24726990, 22782502 |    |
| <i>CYP2B6</i>   | 1555      | 11991950                                                                   |    |
| <i>CYP2C9</i>   | 1559      | 11991950                                                                   |    |
| <i>CYP2D6</i>   | 1565      | 22782502, 21872797                                                         |    |
| <i>CYP2S1</i>   | 29785     | 22782502, 21872797                                                         | UP |
| <i>CYP3A4</i>   | 1576      | 15205382, 11991950, 21872797, 22782502, 16002434                           |    |
| <i>CYP3A43</i>  | 64816     | 22782502, 21872797                                                         |    |
| <i>CYP3A5</i>   | 1577      | 22782502, 21872797                                                         | UP |
| <i>DACT2</i>    | 168002    | 22782502, 21872797                                                         |    |
| <i>DEFB109</i>  | 100286963 | 22782502, 21872797                                                         |    |
| <i>DEFB132</i>  | 400830    | 22782502, 21872797                                                         |    |
| <i>DEFB4</i>    | 1673      | 16002434                                                                   |    |
| <i>DND1</i>     | 373863    | 22782502, 21872797                                                         | UP |
| <i>DNER</i>     | 92737     | 22782502, 21872797                                                         |    |
| <i>DUSP10</i>   | 11221     | 24975273, 22782502, 21872797                                               |    |
| <i>EFCAB4A</i>  | 283229    | 22782502, 21872797                                                         |    |
| <i>EFCAB4B</i>  | 84766     | 22782502, 21872797                                                         |    |
| <i>EFNA5</i>    | 1946      | 22782502, 21872797                                                         |    |
| <i>EPHB4</i>    | 2050      | 22782502, 21872797                                                         |    |
| <i>FGF23</i>    | 8074      | Feldman (2011), 21872797, 22782502, 21870057                               |    |
| <i>FOXO1</i>    | 2308      | 16002434, 21872797, 22782502                                               |    |
| <i>G0S2</i>     | 50486     | 24202443                                                                   |    |
| <i>G6PD</i>     | 2539      | 22782502, 21872797                                                         | UP |
| <i>GADD45A</i>  | 1647      | Feldman (2011), 17721433, 16002434                                         |    |
| <i>GLT8D4</i>   | 727936    | 22782502, 21872797                                                         |    |
| <i>HIF1A</i>    | 3091      | 16002434                                                                   |    |
| <i>HILPDA</i>   | 29923     | 24247221                                                                   |    |
| <i>HLA-DQA1</i> | 3117      | 20736230                                                                   |    |
| <i>HLA-DRB1</i> | 3123      | 20736230                                                                   |    |
| <i>HNF1A</i>    | 6927      | 22782502, 21872797                                                         |    |
| <i>HSD17B2</i>  | 3294      | 16002434                                                                   | UP |
| <i>ID1</i>      | 3397      | 22782502, 21872797                                                         |    |
| <i>ID4</i>      | 3400      | 24726990                                                                   |    |
| <i>IGFBP1</i>   | 3484      | 16186133, Feldman (2011), 19667142, 22213316                               | UP |
| <i>IGFBP3</i>   | 3486      | 16186133, Feldman (2011), 19667142, 22213316, 24726990                     |    |
| <i>IGFBP5</i>   | 3488      | 16186133, Feldman (2011), 19667142, 22213316                               |    |
| <i>IGSF9B</i>   | 22997     | 22782502, 21872797                                                         |    |
| <i>IL12A</i>    | 3592      | 24726990                                                                   |    |
| <i>IL1RL1</i>   | 9173      | 16002434, 24726990                                                         |    |
| <i>IL25</i>     | 64806     | 22782502, 21872797                                                         |    |
| <i>IRF4</i>     | 3662      | 20736230                                                                   |    |
| <i>IRF5</i>     | 3663      | 20736230                                                                   |    |
| <i>IRF8</i>     | 3394      | 22782502, 21872797                                                         |    |
| <i>JUNB</i>     | 3726      | 22782502, 21872797                                                         |    |
| <i>KL</i>       | 9365      | 21872797, 22782502                                                         |    |

|                  |        |                                                                  |    |
|------------------|--------|------------------------------------------------------------------|----|
| <i>KLF4</i>      | 9314   | 24726990                                                         |    |
| <i>KLK6</i>      | 5653   | 16002434                                                         | UP |
| <i>KNG1</i>      | 3827   | 22782502, 21872797                                               |    |
| <i>KRT13</i>     | 3860   | 22782502, 21872797                                               |    |
| <i>KRT16</i>     | 3868   | 22782502, 21872797                                               | UP |
| <i>KRT34</i>     | 3885   | 22782502, 21872797                                               |    |
| <i>KRT38</i>     | 8687   | 22782502, 21872797                                               |    |
| <i>KRT71</i>     | 112802 | 22782502, 21872797                                               |    |
| <i>KRTAP10-2</i> | 386679 | 22782502, 21872797                                               |    |
| <i>KRTAP10-4</i> | 386672 | 22782502, 21872797                                               |    |
| <i>KRTAP10-7</i> | 386675 | 22782502, 21872797                                               |    |
| <i>KRTAP10-9</i> | 386676 | 22782502, 21872797                                               |    |
| <i>KRTAP12-2</i> | 353323 | 22782502, 21872797                                               |    |
| <i>KRTAP4</i>    | 85285  | 22782502, 21872797                                               |    |
| <i>KRTAP5-1</i>  | 387264 | 22782502, 21872797                                               |    |
| <i>KRTAP5-4</i>  | 387267 | 22782502, 21872797                                               |    |
| <i>KRTAP8-1</i>  | 337879 | 22782502, 21872797                                               |    |
| <i>LCE-ID</i>    | 353134 | 22782502, 21872797                                               |    |
| <i>LCE-IF</i>    | 353137 | 22782502, 21872797                                               |    |
| <i>LCE-2B</i>    | 26239  | 22782502, 21872797                                               |    |
| <i>LGALS9</i>    | 3965   | 22782502, 21872797                                               |    |
| <i>LRP5</i>      | 4041   | 21872797, Feldman (2011), 19667142, 22213316, 22782502           |    |
| <i>LRRC25</i>    | 126364 | 22213316                                                         |    |
| <i>MED9</i>      | 55090  | 22782502, 21872797                                               |    |
| <i>MEG8</i>      | 79104  | 22782502, 21872797                                               |    |
| <i>MX2</i>       | 4600   | 22782502, 21872797                                               |    |
| <i>MXD1</i>      | 4084   | 16002434                                                         |    |
| <i>MYC</i>       | 4609   | 24202443, Feldman (2011), 16002434                               |    |
| <i>MYO9B</i>     | 4650   | 22213316                                                         |    |
| <i>NFATC2</i>    | 4773   | 22782502, 21872797                                               |    |
| <i>NINJI</i>     | 4814   | 22213316                                                         |    |
| <i>NOX1</i>      | 27035  | 22782502, 21872797                                               | UP |
| <i>NRIP1</i>     | 8204   | 24975273, 24854954                                               |    |
| <i>ORM1</i>      | 5004   | 22782502, 21872797                                               | UP |
| <i>ORM2</i>      | 5005   | 22782502, 21872797                                               | UP |
| <i>PNOC</i>      | 5368   | 22782502, 21872797                                               |    |
| <i>PPARD</i>     | 5467   | Feldman (2011), 19667142                                         |    |
| <i>PRDM1</i>     | 639    | 20736230                                                         |    |
| <i>PRKCQ</i>     | 5588   | 20736230                                                         |    |
| <i>PTGER4</i>    | 5734   | 20736230                                                         |    |
| <i>PTH</i>       | 5741   | Feldman (2011), 23923049, 17721433, 24726990, 21872797, 22782502 |    |
| <i>PTHLH</i>     | 5744   | 21872797, 22782502                                               |    |
| <i>RASGRP1</i>   | 10125  | 20736230                                                         |    |
| <i>S100A2</i>    | 6273   | 16002434, 22782502                                               |    |
| <i>S100A4</i>    | 6275   | 22782502, 21872797                                               |    |
| <i>S100A6</i>    | 6277   | 22782502, 21872797                                               |    |
| <i>S100A8</i>    | 6279   | 22782502, 16002434, 21872797                                     |    |
| <i>S100A9</i>    | 6280   | 22782502, 21872797                                               |    |
| <i>S100G</i>     | 795    | 21870057                                                         |    |
| <i>SALL4</i>     | 57167  | 22782502, 21872797                                               |    |
| <i>SATB1</i>     | 6304   | 24726990                                                         |    |

|                  |        |                                                                  |    |
|------------------|--------|------------------------------------------------------------------|----|
| <i>SEMA3B</i>    | 7869   | 16002434                                                         |    |
| <i>SERPINB1</i>  | 1992   | 16002434                                                         |    |
| <i>SFRP1</i>     | 6422   | 22782502, 21872797                                               |    |
| <i>SLC2A4</i>    | 6517   | 24247221                                                         | UP |
| <i>SLC34A2</i>   | 10568  | Feldman (2011), 21870057                                         |    |
| <i>SLC37A2</i>   | 219855 | 24854954, 22213316                                               |    |
| <i>SLC8A1</i>    | 6546   | 21870057                                                         |    |
| <i>SOSTDC1</i>   | 25928  | 21872797, 22782502                                               |    |
| <i>SPP1</i>      | 6696   | 21872797, 22782502                                               |    |
| <i>SPRR1B</i>    | 6699   | 22782502, 21872797                                               |    |
| <i>STAM</i>      | 8027   | 20736230                                                         |    |
| <i>STEAP4</i>    | 79689  | 24247221                                                         | UP |
| <i>SULT1C2</i>   | 6819   | 22782502, 21872797                                               | UP |
| <i>SULT2A1</i>   | 6822   | 14978251, 16399349, 22782502                                     |    |
| <i>TGFB1</i>     | 7040   | 24247221                                                         |    |
| <i>TGFB2</i>     | 7042   | 22782502, 21872797                                               |    |
| <i>THBD</i>      | 7056   | 24975273, 24247221, 22213316, 23923049                           |    |
| <i>TIMP2</i>     | 7077   | 22782502, 21872797                                               |    |
| <i>TIMP3</i>     | 7078   | 22782502, 21872797                                               |    |
| <i>TNFAIP3</i>   | 7128   | 20736230                                                         | UP |
| <i>TNFRSF11B</i> | 4982   | 21870057                                                         |    |
| <i>TNFSF11</i>   | 8600   | Feldman (2011), 19667142, 22213316, 21872797, 21870057, 22782502 |    |
| <i>TNFSF4</i>    | 7292   | 20736230                                                         |    |
| <i>TPM1</i>      | 7168   | 24247221                                                         |    |
| <i>TRAK1</i>     | 22906  | 24975273                                                         |    |
| <i>TRPV5</i>     | 56302  | 16002434, 21870057                                               |    |
| <i>TRPV6</i>     | 55503  | Feldman (2011), 24726990, 16002434, 22782502, 21872797           | UP |
| <i>ZNF257</i>    | 113835 | 22782502, 21872797                                               |    |
