# Supplementary material for: Integrative network-based analysis of mRNA and microRNA expression in 1,25-dihydroxyvitamin D3-treated cancer cells
Source: PubMed Central journal article supplement (PMC4537452; doi:10.1007/s12263-015-0484-0), 2015-08-15
Supplement: 12263_2015_484_MOESM2_ESM.pdf [file 12263_2015_484_MOESM2_ESM.pdf]

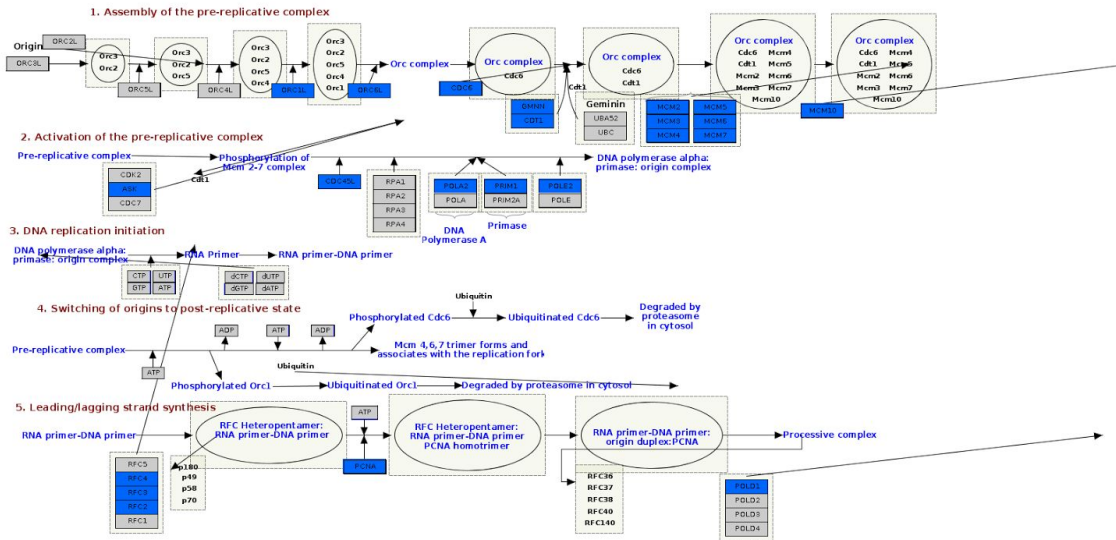

**Figure S2B: DNA replication** (<http://wikipathways.org/index.php/Pathway:WP466>, revision 76196)  
 red = significantly up-regulated, blue = significantly down-regulated, z-score = 11.91

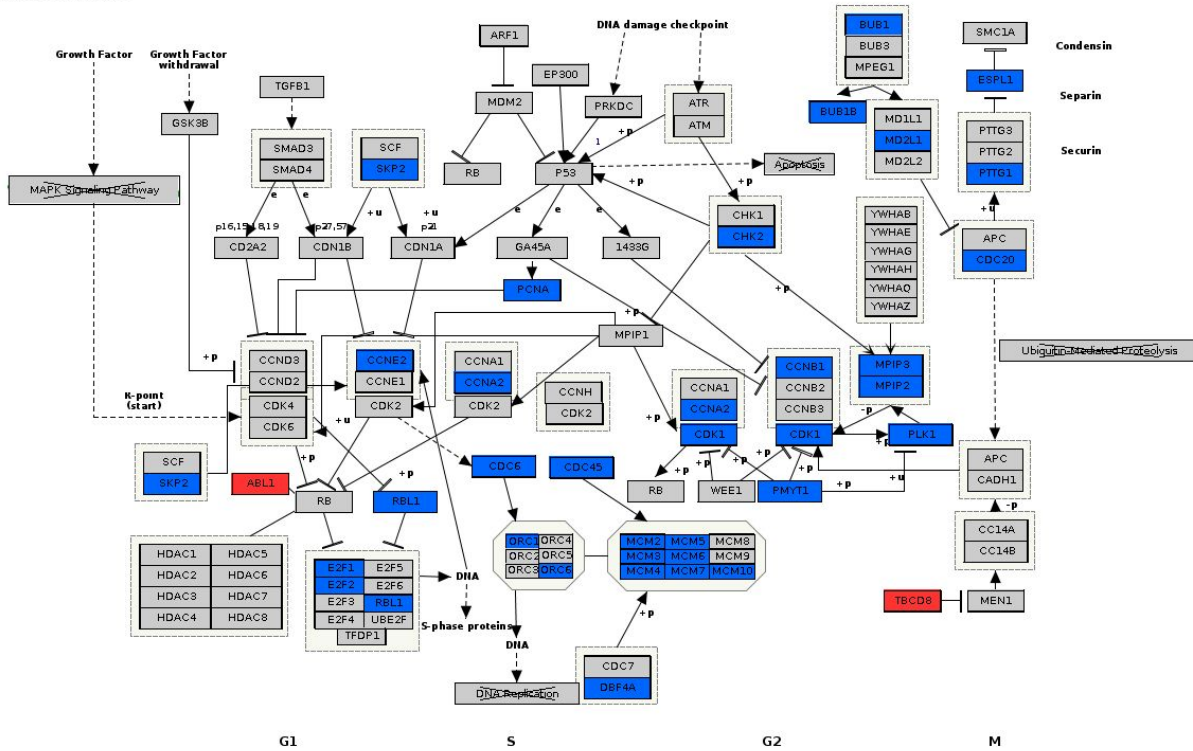

**Figure S2C: Cell cycle** (<http://wikipathways.org/index.php/Pathway:WP179>, revision 70629)  
 red = significantly up-regulated, blue = significantly down-regulated, z-score = 11.04

**Title:** Histone Modifications  
**Organism:** Homo sapiens

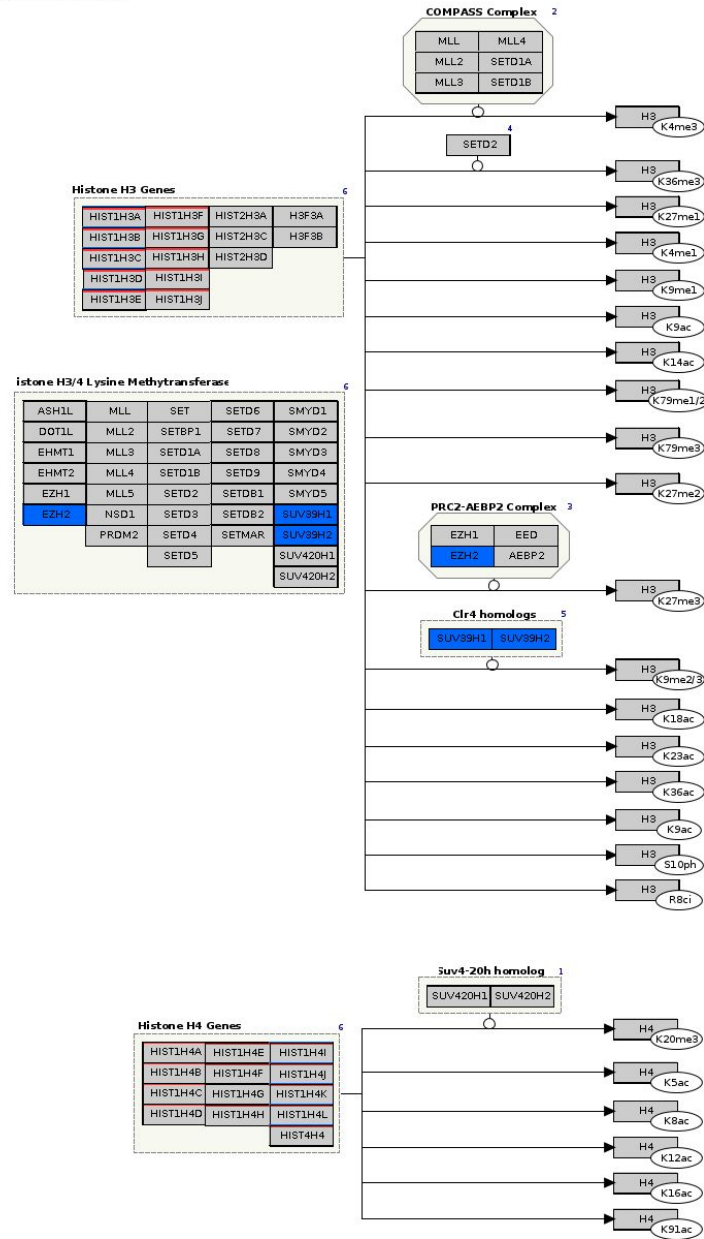

**Figure S2D:** Histone modifications (<http://wikipathways.org/index.php/Pathway:WP2369>, revision 69927)  
 red = significantly up-regulated, blue = significantly down-regulated, z-score = 10.44

Title: Gastric cancer network 1  
 Last modified: 10/17/2013  
 Organism: Homo sapiens

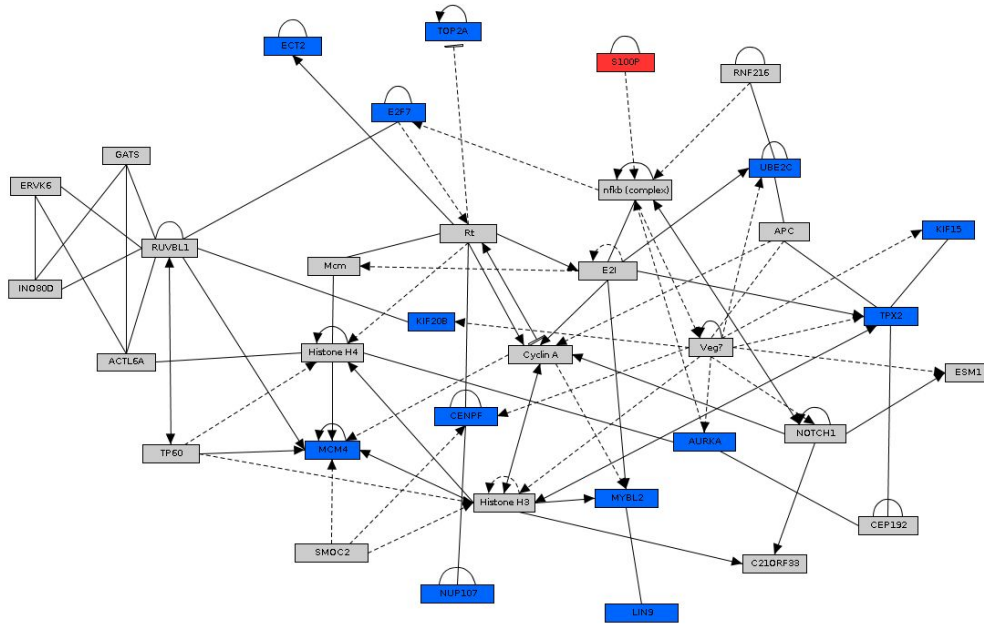

Figure S2E: Gastric cancer network 1 (<http://wikipathways.org/index.php/Pathway:WP2361>, revision 77608) red = significantly up-regulated, blue = significantly down-regulated, z-score = 10.44

Title: G1 to S cell cycle control  
 Availability: CC BY 2.0  
 Last modified: 10/17/2013  
 Organism: Homo sapiens

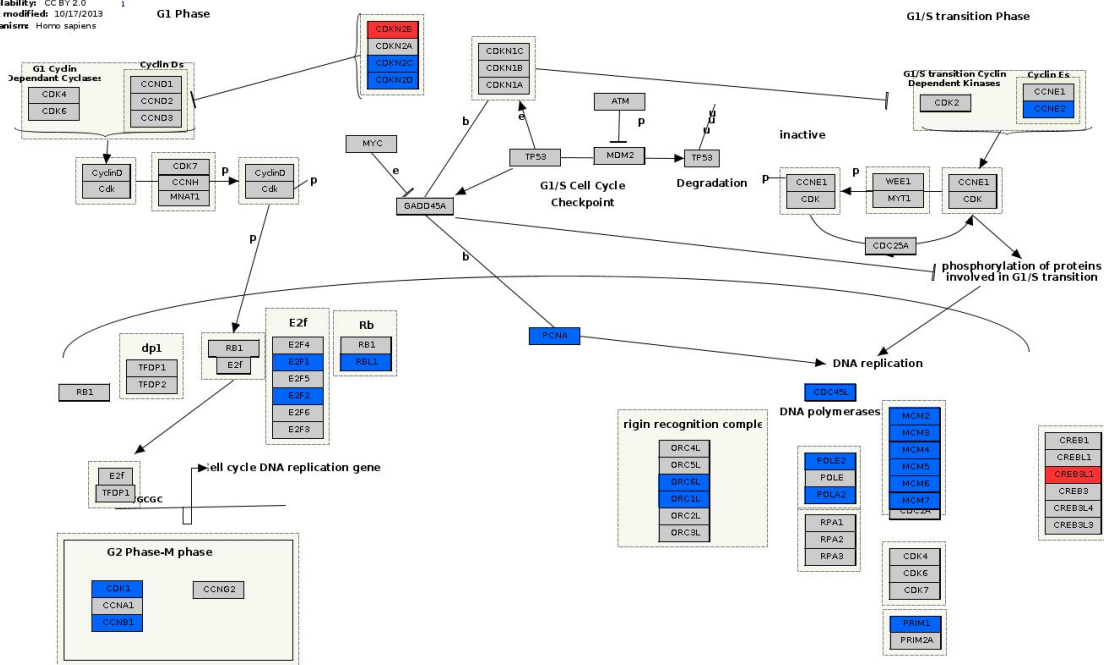

Figure S2F: G1 to S cell cycle control (<http://wikipathways.org/index.php/Pathway:WP45>, revision 71377) red = significantly up-regulated, blue = significantly down-regulated, z-score = 9.12

Title: DNA Damage Response  
 Availability: CC BY 2.0  
 Organism: Homo sapiens

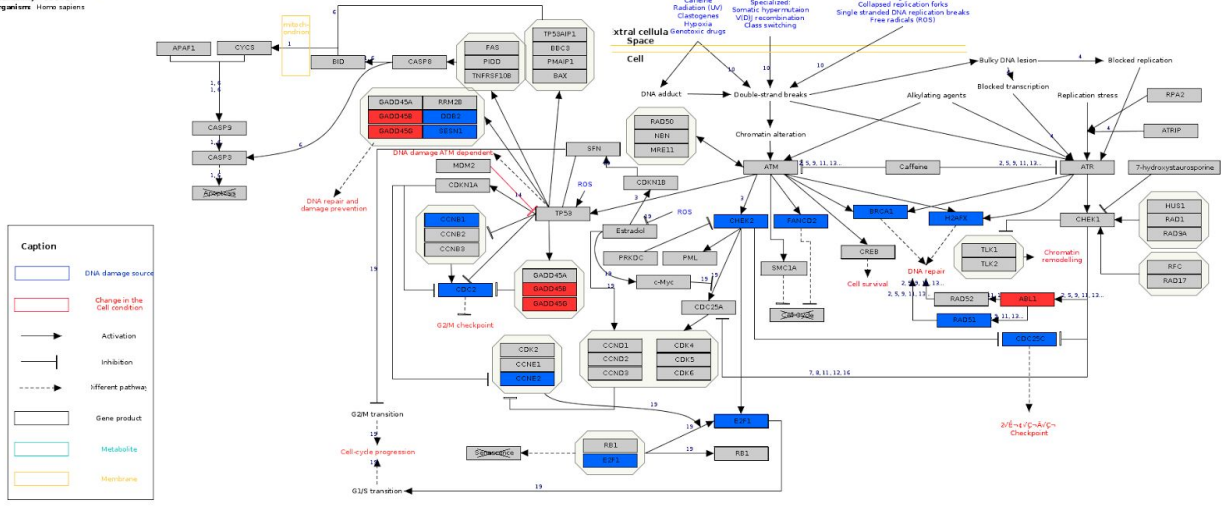

**Figure S2G:** DNA damage response (<http://wikipathways.org/index.php/Pathway:WP707>, revision 78527)  
 red = significantly up-regulated, blue = significantly down-regulated, z-score = 5.40

Title: Gastric cancer network 2  
 Last modified: 10/17/2013  
 Organism: Homo sapiens

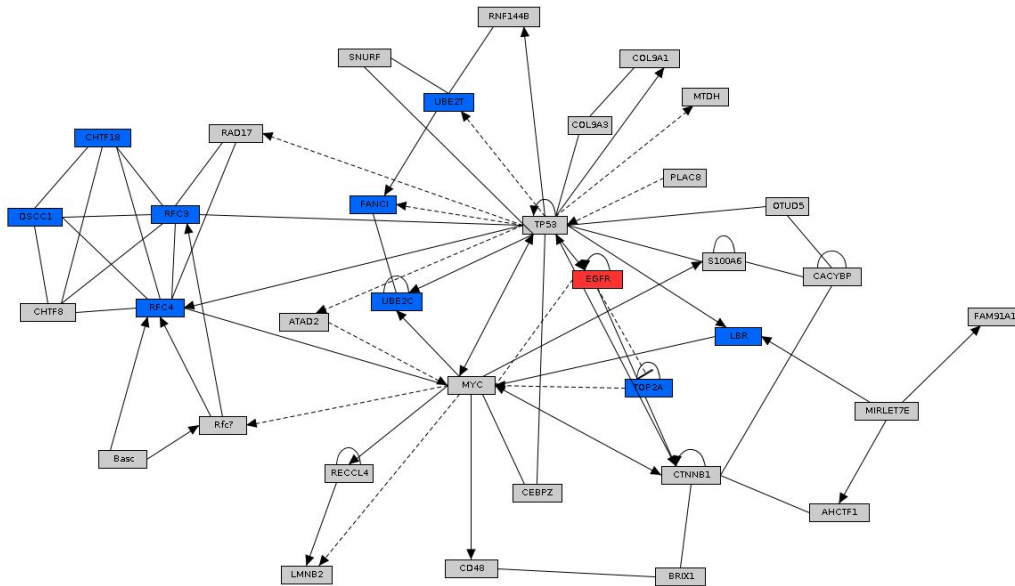

**Figure S2H:** Gastric cancer network 2 (<http://wikipathways.org/index.php/Pathway:WP2363>, revision 76329)  
 red = significantly up-regulated, blue = significantly down-regulated, z-score = 5.13



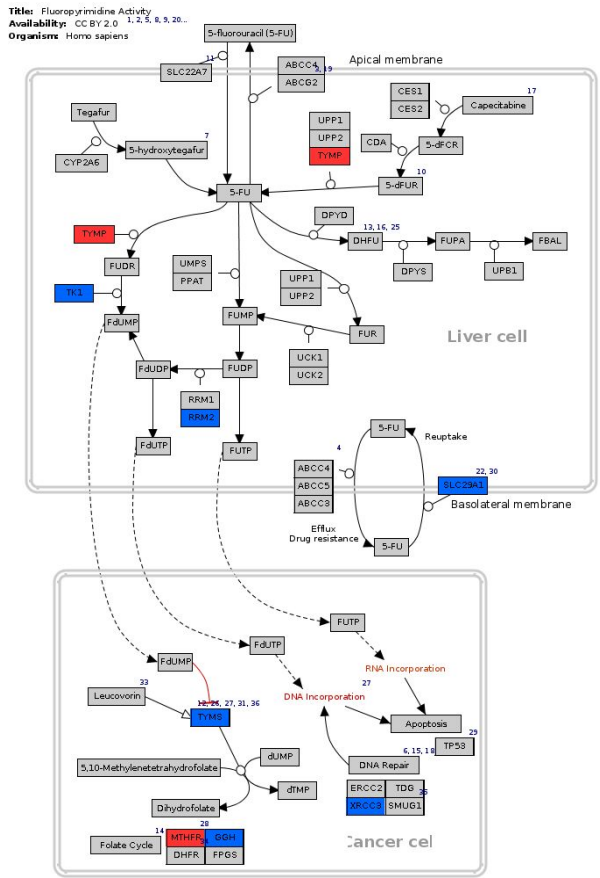

**Figure S2J:** Fluoropyrimidine Activity (<http://wikipathways.org/index.php/Pathway:WP1601>, revision 78516) red = significantly up-regulated, blue = significantly down-regulated, z-score = 4.16

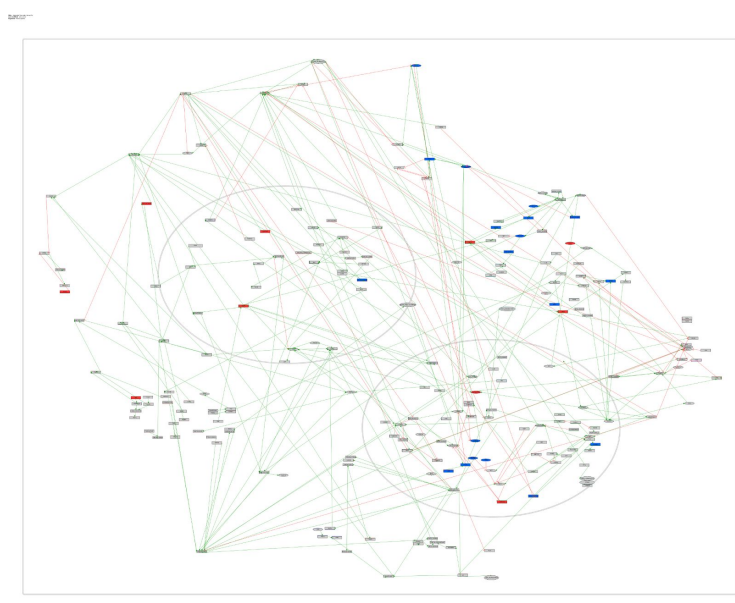

**Figure S2K:** Integrated Pancreatic Cancer Pathway (<http://wikipathways.org/index.php/Pathway:WP2377>, revision 71228), red = significantly up-regulated, blue = significantly down-regulated, z-score = 4.08

**Title:** Integrated Cancer pathway  
**Availability:** CC BY 2.0  
**Last modified:** 10/16/2013  
**Organism:** Homo sapiens

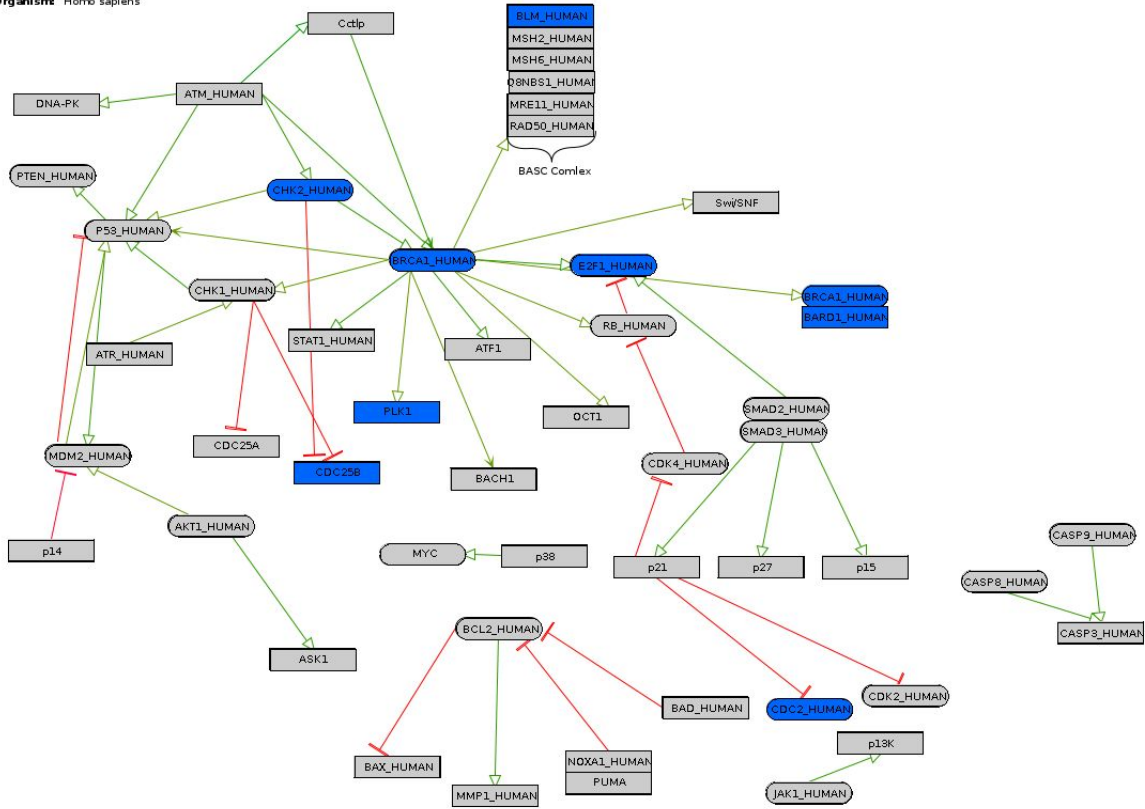

**Figure S2L:** Integrated Cancer pathway (<http://wikipathways.org/index.php/Pathway:WP1971>, revision 71249) red = significantly up-regulated, blue = significantly down-regulated, z-score = 3.85

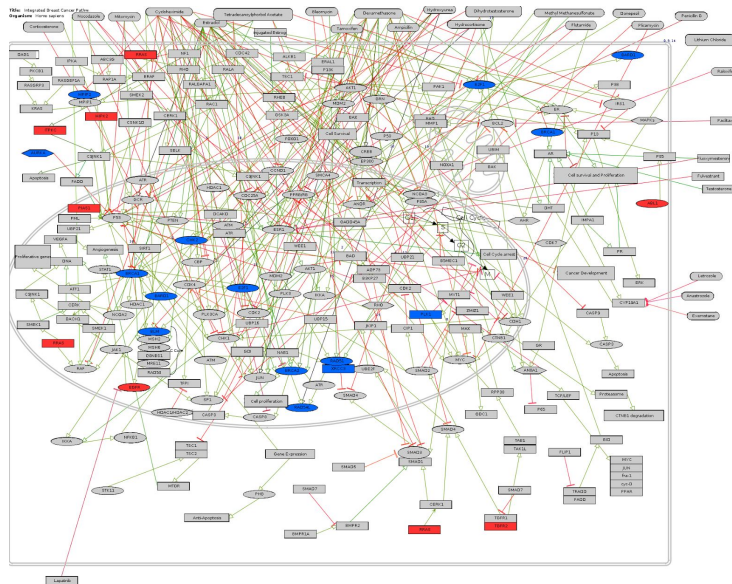

**Figure S2M:** Integrated Breast Cancer Pathway (<http://wikipathways.org/index.php/Pathway:WP1984>, revision 72732), red = significantly up-regulated, blue = significantly down-regulated, z-score = 3.41



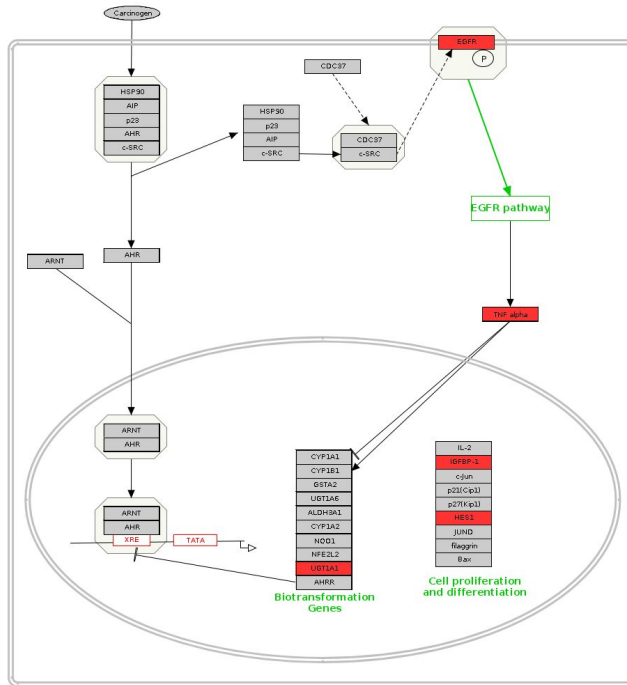

**Figure S2N:** Arylhydrocarbon receptor (AhR) signaling pathway (<http://wikipathways.org/index.php/Pathway:WP2100>, revision 74081)  
 red = significantly up-regulated, blue = significantly down-regulated, z-score = 2.47

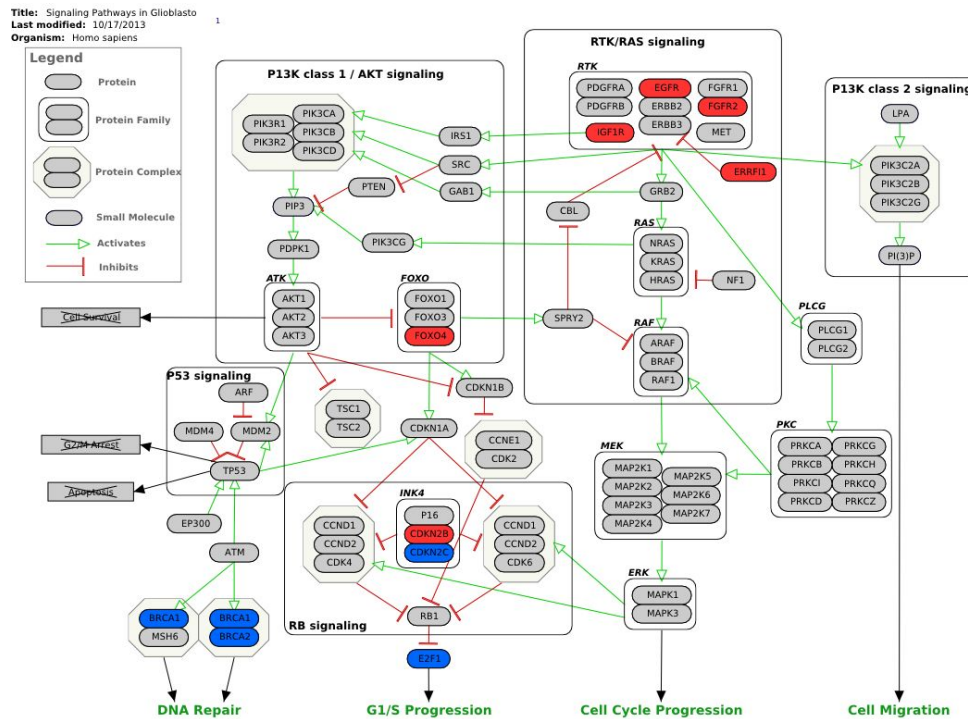

**Figure S2O:** Signaling Pathways in Glioblastoma (<http://wikipathways.org/index.php/Pathway:WP2261>, revision 78522), red = significantly up-regulated, blue = significantly down-regulated, z-score = 2.02
