# Supplementary material for: Integrative network-based analysis of mRNA and microRNA expression in 1,25-dihydroxyvitamin D3-treated cancer cells
Source: PubMed Central journal article supplement (PMC4537452; doi:10.1007/s12263-015-0484-0), 2015-08-15
Supplement: 12263_2015_484_MOESM4_ESM.pdf [file 12263_2015_484_MOESM4_ESM.pdf]

## Supplementary Material 4: Vitamin D-extended network

**Article Title:** Integrative network-based analysis of mRNA and microRNA expression in 1,25-dihydroxyvitamin D3-treated cancer cells

**Journal name:** Genes & Nutrition

**Author Names:** Martina Kutmon, Susan L Coort, Kim de Nooijer, Claire Lemmens, Chris T Evelo

**Email address:** [martina.kutmon@maastrichtuniversity.nl](mailto:martina.kutmon@maastrichtuniversity.nl)

---

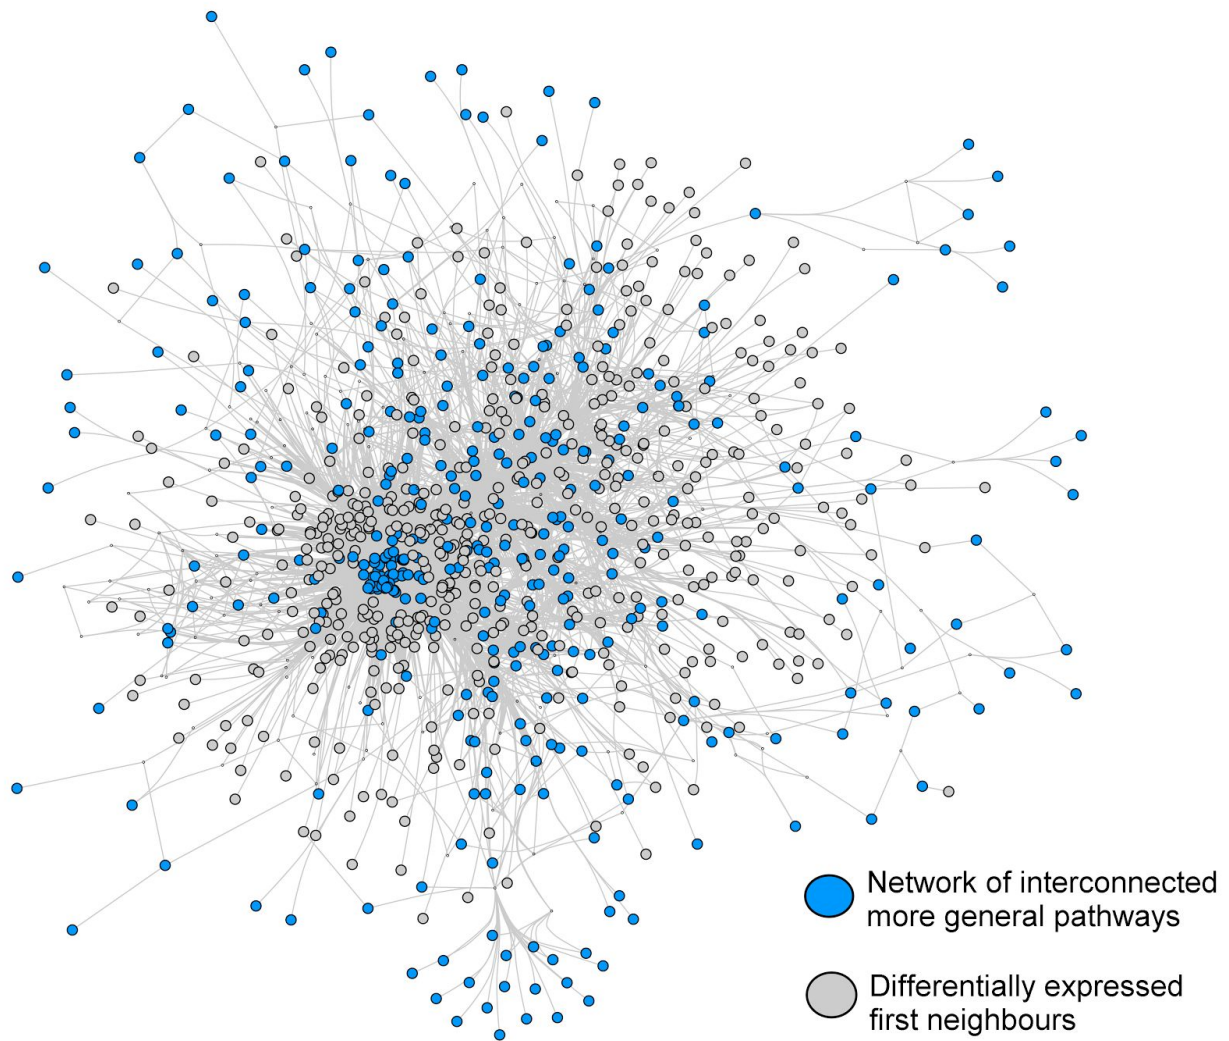

**Figure S4A: Merged pathways were extended with first neighbours.** The extended network consists of 1,013 nodes and 9,200 edges. 503 nodes (blue) from the selected more general (cell cycle related) pathways were extended with 510 nodes (gray) from STRING and ENCODE.

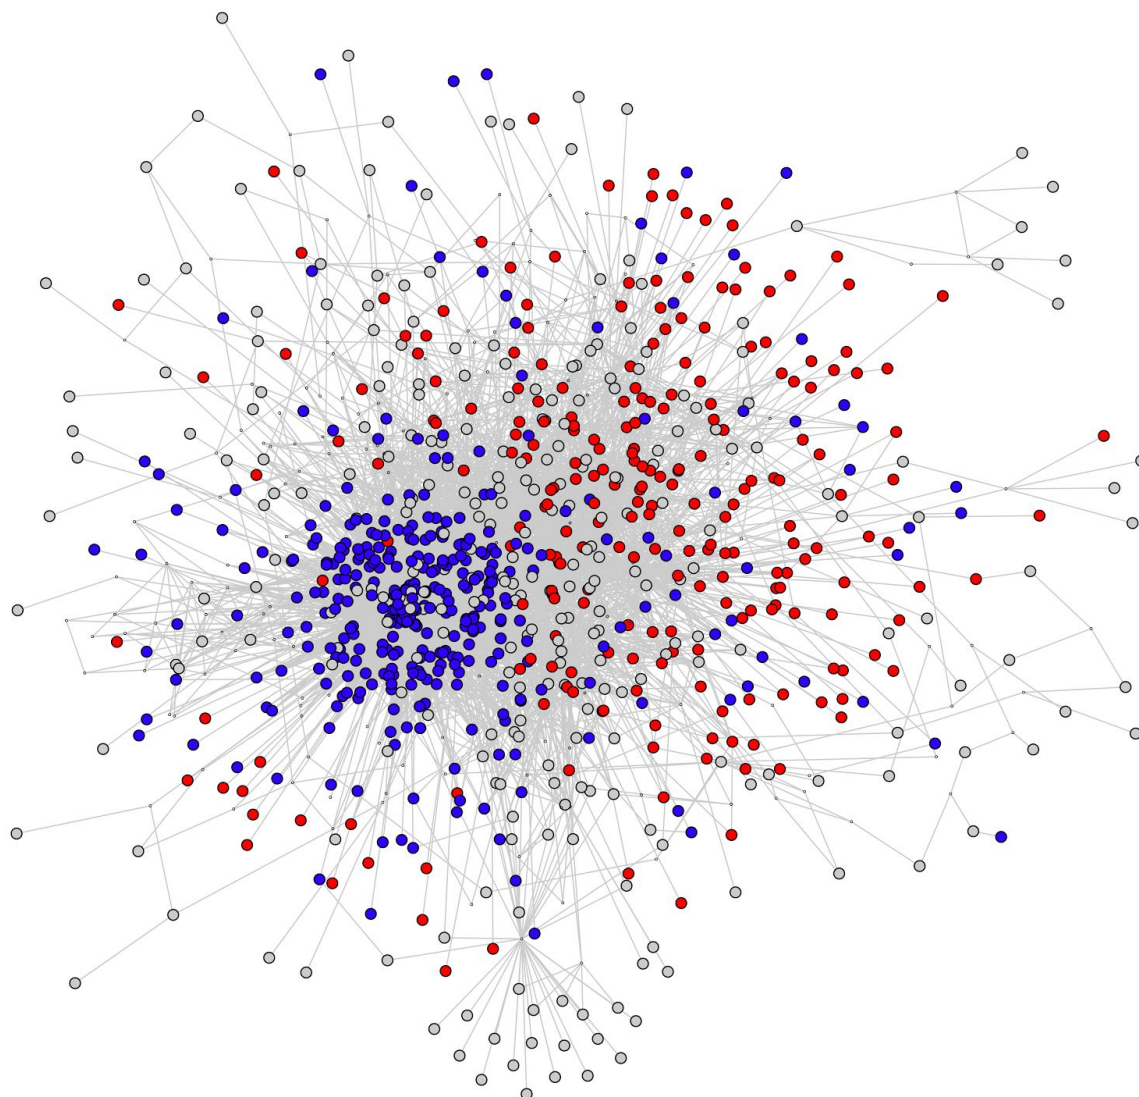

**Figure S4B: Differentially expressed genes in the vitamin D-extended network.** The extended network contains 238 up- and 345 down-regulated genes. 70% of all differentially expressed genes in  $1,25(\text{OH})_2\text{D}_3$ -treated cancer cells are now present in the network.
